# Supplementary material
Source: MDPI journal article supplement (https://www.mdpi.com/2071-1050/10/3/893)
Supplement: s1 [file s1]

# 1 Supplementary Material

2 **Figure S1:** Map of the Volta delta depicting the study site (region within the red line).

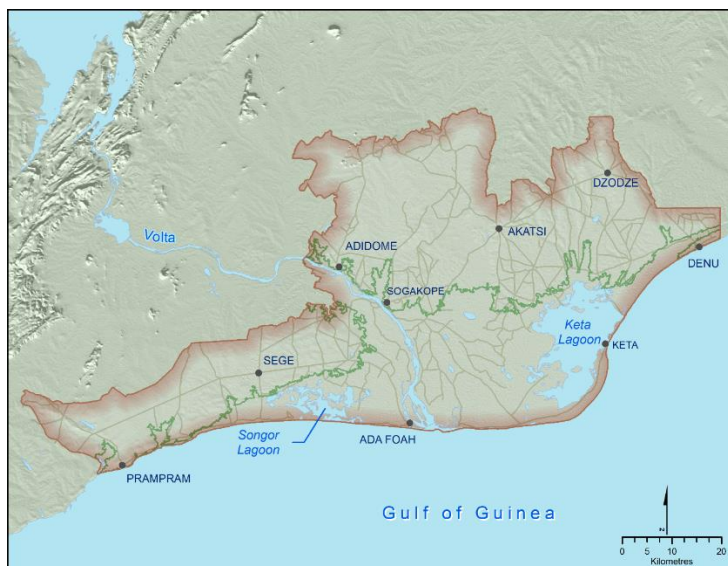

3 Source: DECCMA-WP2 (2017).

4 **Figure S2:** Map of the Mahanadi delta depicting the study site (region within the red line).

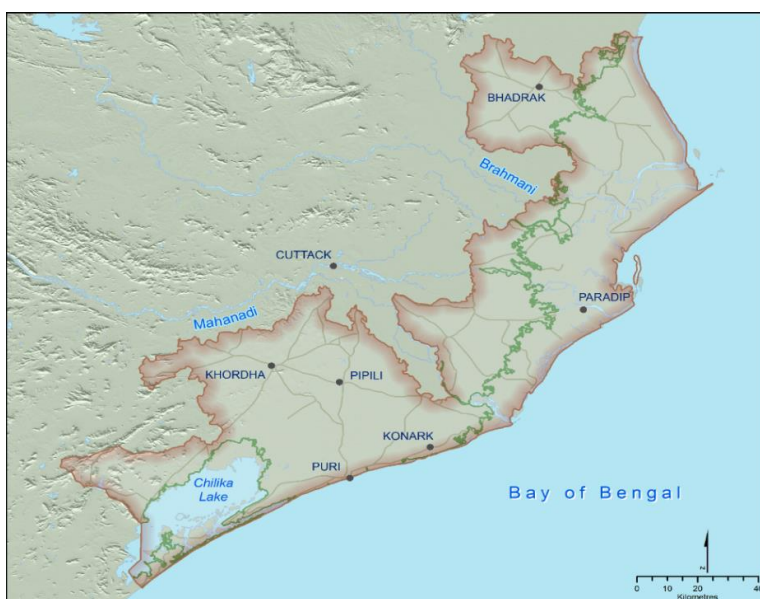

5 Source: DECCMA-WP2 (2017).

6

**Figure S3:** Map of the Indian Bengal delta depicting the study site (region within the pink line on the left hand side).

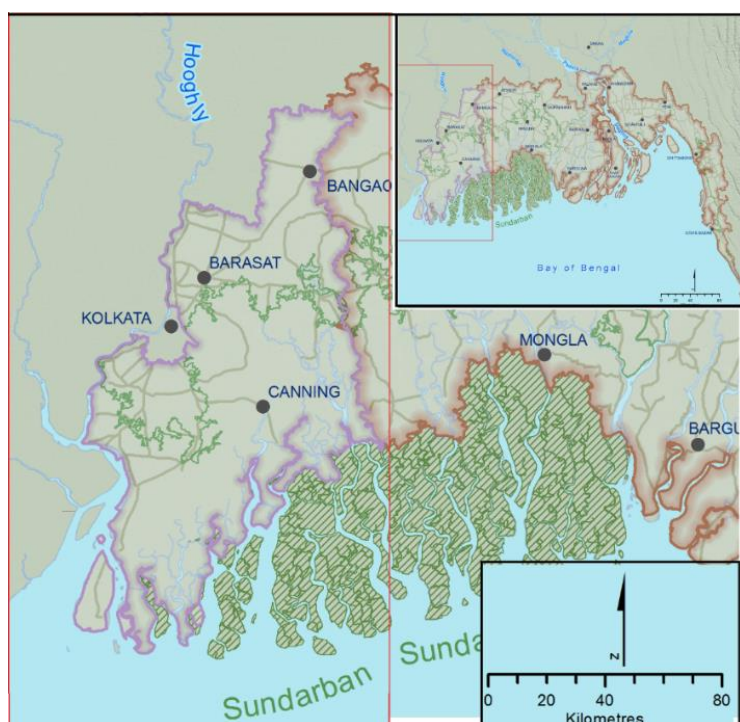

Source: DECCMA-WP2 (2017).

**Figure S4:** Map of the Ganges-Brahmaputra-Meghna Bangladeshi delta depicting the study site (region within the red line).

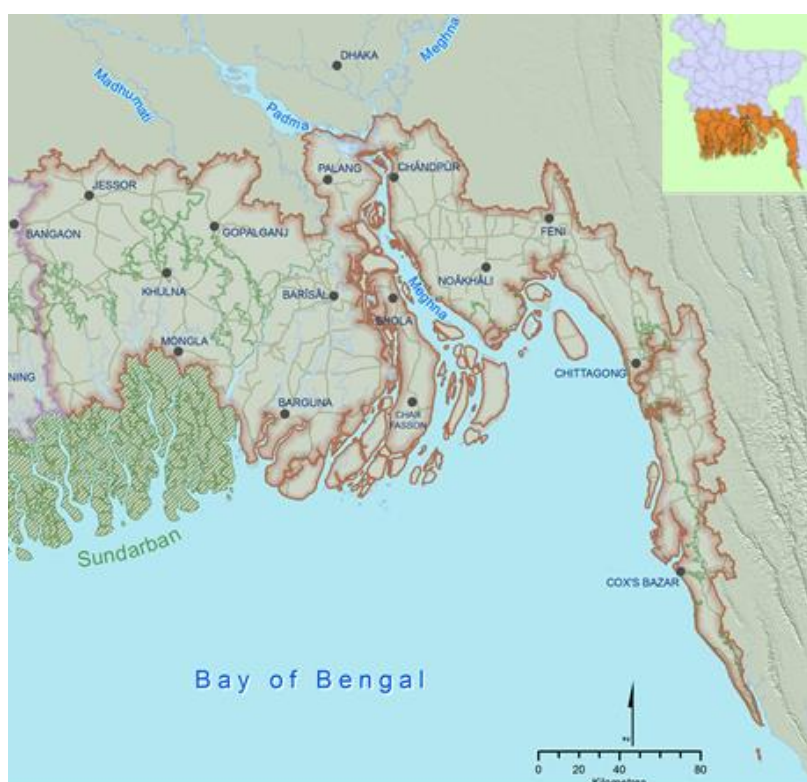

Source: DECCMA-WP2 (2017).

### 1.1. “Climatic (rainfall, etc.) conditions of the study sites”

#### 1.1.1. The Volta delta

In terms of climate, the Volta delta can be said to be lying within the wet semi-equatorial and the dry equatorial climatic zones. The climatic conditions of the Volta delta being influenced by the Southwest monsoon winds twice a year results in a double maximum rainfall pattern: the major rainy season falls between March and July while the minor one begins in August and ends in November. The annual precipitation averages vary between 146 mm and 750 mm. From November to February the north eastern harmattan winds<sup>1</sup> dominate, giving rise to a long dry season in the region (Awadzi *et al.*, 2008; Allersma and Tilsman, 1993). *One can observe from data on the Volta delta that rainfall levels are highly erratic. Rainfall levels are high in the major and minor raining seasons and low in the dry seasons. Between 2000-2013 for example, the maximum rainfall level observed was 639 mm and the minimum was 1 mm.* Temperatures in the Volta delta are quite high with mean monthly temperature of about 30°C in the warmest month, March, and about 26°C in the coldest month, August.

Climate is an important input to many human activities. Climate affects heating and cooling requirements, health, clothing and nutritional needs as well as recreational activities. Individuals across the world will prefer particular types of climate (see Rehdanz and Maddison, 2005), but in general in the studied coastal areas climate change is seen with fear, and already several effects such as coastal erosion, decrease of fish availability, etc. have been identified for the Volta delta. An assessment of the Volta Delta Shoreline Change can be seen e.g. in Appeaning Addo (2015) and proposals such as sea defence systems are often and increasingly discussed as climate change adaptation. Climate change adaptation, the process of building climate-resilient socioeconomic systems (see e.g. Vale, 2016 on how economics has recently addressed it), is then a major topic of discussion for the delta by the authorities and by the DECCMA project research.

#### 1.1.2. The Mahanadi delta

The Mahanadi delta experiences a tropical with hot and humid monsoonal climate. The delta receives an average annual rainfall of 1,572 mm of which over 70% is precipitated during the southwest monsoon between middle of June to middle of October. The first week of June is the normal time of onset of monsoon over the delta. The amount of rainfall receives in January to February is less than 50 mm. The mean summer temperature of the region varies near 29°C and winter temperatures near 21°C. The Mahanadi river originates from Raipur district of Chhattisgarh and flows for about 851 km before it drains into the Bay of Bengal<sup>2</sup>. The annual discharge of Mahanadi River measured at Naraj is 48,691 million cubic metres.

We have seen that climate affects heating and cooling requirements, health, clothing and nutritional needs as well as recreational activities. As indicated above, in the studied coastal areas climate change is already affecting, notably the ecosystems, and people perceive environmental change. Climate change cannot be a single cause of mobility, but there is large agreement that it could reinforce existing drivers of migration (Black *et al.* 2011, Afifi and Warner 2008).

#### 1.1.3. The Indian Bengal delta

The average temperature varies between 34°C (maximum) and 13.7°C (minimum). During pre-monsoon, the maximum temperature varies between 26°C and 40°C. The climate is pleasant during the winter and temperature rarely goes below 10°C. Relative humidity is over 80% from June to

---

<sup>1</sup> It refers to the dry and dusty northeasterly trade wind (which blows from the Sahara Desert over West Africa into the Gulf of Guinea) of the Harmattan season, which occurs in the West African subcontinent, between the end of November and the middle of March. {Duchin, 2015 #7772}

<sup>2</sup> Its main tributaries are the Seonath, the Jonk, the Hasdeo, the Mand, the ib, the Ong and the Tel. Other distributaries of Mahanadi include the Paika, Birupa, Chitroptala River, Genguti and Lun. Birupa later joins the Brahmani River at Khushnanagar.

September and over 75% from October to May. The climate of the delta is humid and can be categorized into pre-monsoon (February to May), monsoon (June to September), and post monsoon (October to January). The total annual rainfall is in the range of 1500–2000 mm. A large component of the annual rainfall (about 74% of the total) occurs during the Southwest monsoon period (June–September), which floods the delta. As can be witnessed from Figure 6, precipitation is also received during May (the tail-end of the summer) and in October (the beginning of the post-monsoon phase).

Two dominant prevailing winds during Southwest and Northeast monsoons lead to the Southwesterly and the North-easterly wind. The normal maximum wind velocity is 16.7–50 km/h (April–June) and minimum wind velocity is 10.7–11.8 km/h (December–February). The prevalence of cyclonic storms can be witnessed during April, often associated with monsoon rainfall during July and August.

The Indian Sundarbans are experiencing the effects of climate change. Global warming, deglaciation of the Gangotri Glacier in the Himalayan ranges, Farakka barrage discharges and SLR have accelerated such changes over the last two decades. Observations of salinity over a period of 23 years (1990–2012) showed a significant long-term variation. Due to different geographical settings in the western, central and eastern sectors of the deltaic Sundarbans, the footprints of these changes manifested in different patterns and on different scales (Banerjee, 2013). As human populations expanded, the shortage of productive land in many developing countries led to clearing large areas of mangrove for agriculture and aquaculture production. Demands for timber (for charcoal, building, etc.) and coastal development space have been highly damaging. Mangrove forests in some areas were reduced to mere relicts of their former ranges because of human exploitation. The common perception of increased salinity is due to increased evaporation resulting in an increase in salinity, and by SLR, projected between 0.9 and 8.8 mm/year. The observed changes could be attributed to climate change consequences, human interventions and related phenomena. The ecological impact of such changes is an alarming signal for shoreline changes due to shifting of the mangroves inward (Banerjee, 2013).

#### 1.1.4. The Bangladeshi Bengal delta

The BB delta lies mostly in the tropical wet climate zone. In general, maximum summer temperatures range between 38°C and 41°C and April is the hottest month in most parts of the country. January is the coolest month, when the average temperature for most of the country is 16–20°C during the day and around 10°C at night. Heavy rainfall is characteristic for Bangladesh. Except for the relatively dry western region of Rajshahi, most parts of the country receive at least 2,300 mm of rainfall per year. Because of its location just south of the foothills of the Himalayas, where monsoon winds turn west and northwest, the region of Sylhet in north-eastern Bangladesh receives the greatest average precipitation. The average monthly rainfall patterns reveal that the dominant months in Bangladesh regarding the rainfall are May to September with peak in June–August (the monsoon season).

The average annual discharge of the three rivers into the Bay of Bengal is approximately 30,000 m<sup>3</sup>/s. During flood seasons, the maximum discharge may exceed 80,000 m<sup>3</sup>/s. From the analysis of historical data of Bahadurabad in Jamuna River from 1956 to 2007, it has been found that severe flooding may become more frequently soon (IWM, 2007). Another threat may come from climate change on the flow of these three rivers. If rainfall increases by 13% in the GBM basin and sea levels rise by 17 cm, the maximum flood level will increase by 37 cm in the Bahadurabad in Jamuna River which may create an additional 13,000 m<sup>3</sup>/s flow in monsoon periods (IWM, 2007, 2008), and 12% to 16% increase in area will be inundated in the Ganges and Brahmaputra basin (IWM, 2007, 2008).

The cyclone of April 1991 induced a storm surge of 6–7.5 m height and caused nearly 150,000 deaths. The 1970 Bhola cyclone was less powerful, but is nonetheless the deadliest tropical cyclone on record, being estimated that between 300,000 and 500,000 people lost their lives. To reduce loss of lives and property, Bangladesh focuses on the development of flood forecasting and warning systems. But climate change may enhance these problems due to increase in precipitation and SLR. Intensity and frequency of cyclonic storm is expected to increase due to climate change, which will

aggravate the cyclonic flood also. Vulnerability of Bangladesh's agriculture to climate change is also evident, and farm-level adaptation to climate change is being studied, e.g. on rice farmers' preferred adaptation strategies, perceived barriers, and policy implications (Alauddin and Sarker, 2014). Also among other threats, fisheries in the southwest coastal region of Bangladesh will face threats because of climate change, notably adverse impacts from increased aquatic salinity caused by SLR, which may have an especially negative impact on poor households in the region (Dasgupta et al., 2017).

**Table S1.** List of the 57 GTAP sectors

(<https://www.gtap.agecon.purdue.edu/databases/contribute/detailedsector.asp>)

| Number | Code | Description                                                                                                                                                                                                                                                                                                                                                                                                                                                                                                                                                                                                                                                                                                                                      |
|--------|------|--------------------------------------------------------------------------------------------------------------------------------------------------------------------------------------------------------------------------------------------------------------------------------------------------------------------------------------------------------------------------------------------------------------------------------------------------------------------------------------------------------------------------------------------------------------------------------------------------------------------------------------------------------------------------------------------------------------------------------------------------|
| 1      | Pdr  | Paddy Rice: rice, husked and unhusked                                                                                                                                                                                                                                                                                                                                                                                                                                                                                                                                                                                                                                                                                                            |
| 2      | Wht  | Wheat: wheat and meslin                                                                                                                                                                                                                                                                                                                                                                                                                                                                                                                                                                                                                                                                                                                          |
| 3      | Gro  | Other Grains: maize (corn), barley, rye, oats, other cereals                                                                                                                                                                                                                                                                                                                                                                                                                                                                                                                                                                                                                                                                                     |
| 4      | v_f  | Veg & Fruit : vegetables, fruit vegetables, fruit and nuts, potatoes, cassava, truffles,                                                                                                                                                                                                                                                                                                                                                                                                                                                                                                                                                                                                                                                         |
| 5      | Osd  | Oil Seeds: oil seeds and oleaginous fruit; soy beans, copra                                                                                                                                                                                                                                                                                                                                                                                                                                                                                                                                                                                                                                                                                      |
| 6      | c_b  | Cane & Beet: sugar cane and sugar beet                                                                                                                                                                                                                                                                                                                                                                                                                                                                                                                                                                                                                                                                                                           |
| 7      | Pfb  | Plant Fibres: cotton, flax, hemp, sisal and other raw vegetable materials used in textiles                                                                                                                                                                                                                                                                                                                                                                                                                                                                                                                                                                                                                                                       |
| 8      | Ocr  | Other Crops: live plants; cut flowers and flower buds; flower seeds and fruit seeds; vegetable seeds, beverage and spice crops, unmanufactured tobacco, cereal straw and husks, unprepared, whether or not chopped, ground, pressed or in the form of pellets; swedes, mangolds, fodder roots, hay, lucerne (alfalfa), clover, sainfoin, forage kale, lupines, vetches and similar forage products, whether or not in the form of pellets, plants and parts of plants used primarily in perfumery, in pharmacy, or for insecticidal, fungicidal or similar purposes, sugar beet seed and seeds of forage plants, other raw vegetable materials                                                                                                   |
| 9      | Ctl  | Cattle: cattle, sheep, goats, horses, asses, mules, and hinnies; and semen thereof                                                                                                                                                                                                                                                                                                                                                                                                                                                                                                                                                                                                                                                               |
| 10     | oap  | Other Animal Products: swine, poultry and other live animals; eggs, in shell (fresh or cooked), natural honey, snails (fresh or preserved) except sea snails; frogs' legs, edible products of animal origin n.e.c., hides, skins and furskins, raw, insect waxes and spermaceti, whether or not refined or coloured                                                                                                                                                                                                                                                                                                                                                                                                                              |
| 11     | rmk  | Raw milk                                                                                                                                                                                                                                                                                                                                                                                                                                                                                                                                                                                                                                                                                                                                         |
| 12     | wol  | Wool: wool, silk, and other raw animal materials used in textile                                                                                                                                                                                                                                                                                                                                                                                                                                                                                                                                                                                                                                                                                 |
| 13     | frs  | Forestry: forestry, logging and related service activities                                                                                                                                                                                                                                                                                                                                                                                                                                                                                                                                                                                                                                                                                       |
| 14     | fsh  | Fishing: hunting, trapping and game propagation including related service activities, fishing, fish farms; service activities incidental to fishing                                                                                                                                                                                                                                                                                                                                                                                                                                                                                                                                                                                              |
| 15     | coa  | Coal: mining and agglomeration of hard coal, lignite and peat                                                                                                                                                                                                                                                                                                                                                                                                                                                                                                                                                                                                                                                                                    |
| 16     | oil  | Oil: extraction of crude petroleum and natural gas (part), service activities incidental to oil and gas extraction excluding surveying (part)                                                                                                                                                                                                                                                                                                                                                                                                                                                                                                                                                                                                    |
| 17     | gas  | Gas: extraction of crude petroleum and natural gas (part), service activities incidental to oil and gas extraction excluding surveying (part)                                                                                                                                                                                                                                                                                                                                                                                                                                                                                                                                                                                                    |
| 18     | omn  | Other Mining: mining of metal ores, uranium, gems. other mining and quarrying                                                                                                                                                                                                                                                                                                                                                                                                                                                                                                                                                                                                                                                                    |
| 19     | cmt  | Cattle Meat: fresh or chilled meat and edible offal of cattle, sheep, goats, horses, asses, mules, and hinnies. raw fats or grease from any animal or bird.                                                                                                                                                                                                                                                                                                                                                                                                                                                                                                                                                                                      |
| 20     | omt  | Other Meat: pig meat and offal. preserves and preparations of meat, meat offal or blood, flours, meals and pellets of meat or inedible meat offal; greaves                                                                                                                                                                                                                                                                                                                                                                                                                                                                                                                                                                                       |
| 21     | vol  | Vegetable Oils: crude and refined oils of soya-bean, maize (corn),olive, sesame, ground-nut, olive, sunflower-seed, safflower, cotton-seed, rape, colza and canola, mustard, coconut palm, palm kernel, castor, tung jojoba, babassu and linseed, perhaps partly or wholly hydrogenated,inter-esterified, re-esterified or elaidinised. Also margarine and similar preparations, animal or vegetable waxes, fats and oils and their fractions, cotton linters, oil-cake and other solid residues resulting from the extraction of vegetable fats or oils; flours and meals of oil seeds or oleaginous fruits, except those of mustard; degreas and other residues resulting from the treatment of fatty substances or animal or vegetable waxes. |
| 22     | mil  | Milk: dairy products                                                                                                                                                                                                                                                                                                                                                                                                                                                                                                                                                                                                                                                                                                                             |

|    |     |                                                                                                                                                                                                                                                                                                                                                                                                                                                                                                                                                                                                                               |
|----|-----|-------------------------------------------------------------------------------------------------------------------------------------------------------------------------------------------------------------------------------------------------------------------------------------------------------------------------------------------------------------------------------------------------------------------------------------------------------------------------------------------------------------------------------------------------------------------------------------------------------------------------------|
| 23 | pcr | Processed Rice: rice, semi- or wholly milled                                                                                                                                                                                                                                                                                                                                                                                                                                                                                                                                                                                  |
| 24 | sgr | Sugar                                                                                                                                                                                                                                                                                                                                                                                                                                                                                                                                                                                                                         |
| 25 | ofd | Other Food: prepared and preserved fish or vegetables, fruit juices and vegetable juices, prepared and preserved fruit and nuts, all cereal flours, groats, meal and pellets of wheat, cereal groats, meal and pellets n.e.c., other cereal grain products (including corn flakes), other vegetable flours and meals, mixes and doughs for the preparation of bakers' wares, starches and starch products; sugars and sugar syrups n.e.c., preparations used in animal feeding, bakery products, cocoa, chocolate and sugar confectionery, macaroni, noodles, couscous and similar farinaceous products, food products n.e.c. |
| 26 | b_t | Beverages and Tobacco products                                                                                                                                                                                                                                                                                                                                                                                                                                                                                                                                                                                                |
| 27 | tex | Textiles: textiles and man-made fibres                                                                                                                                                                                                                                                                                                                                                                                                                                                                                                                                                                                        |
| 28 | wap | Wearing Apparel: Clothing, dressing and dyeing of fur                                                                                                                                                                                                                                                                                                                                                                                                                                                                                                                                                                         |
| 29 | lea | Leather: tanning and dressing of leather; luggage, handbags, saddlery, harness and footwear                                                                                                                                                                                                                                                                                                                                                                                                                                                                                                                                   |
| 30 | lum | Lumber: wood and products of wood and cork, except furniture; articles of straw and plaiting materials                                                                                                                                                                                                                                                                                                                                                                                                                                                                                                                        |
| 31 | ppp | Paper & Paper Products: includes publishing, printing and reproduction of recorded media                                                                                                                                                                                                                                                                                                                                                                                                                                                                                                                                      |
| 32 | p_c | Petroleum & Coke: coke oven products, refined petroleum products, processing of nuclear fuel                                                                                                                                                                                                                                                                                                                                                                                                                                                                                                                                  |
| 33 | crp | Chemical Rubber Products: basic chemicals, other chemical products, rubber and plastics products                                                                                                                                                                                                                                                                                                                                                                                                                                                                                                                              |
| 34 | nmm | Non-Metallic Minerals: cement, plaster, lime, gravel, concrete                                                                                                                                                                                                                                                                                                                                                                                                                                                                                                                                                                |
| 35 | i_s | Iron & Steel: basic production and casting                                                                                                                                                                                                                                                                                                                                                                                                                                                                                                                                                                                    |
| 36 | nfm | Non-Ferrous Metals: production and casting of copper, aluminium, zinc, lead, gold, and silver                                                                                                                                                                                                                                                                                                                                                                                                                                                                                                                                 |
| 37 | fmp | Fabricated Metal Products: Sheet metal products, but not machinery and equipment                                                                                                                                                                                                                                                                                                                                                                                                                                                                                                                                              |
| 38 | mvh | Motor Motor vehicles and parts: cars, lorries, trailers and semi-trailers                                                                                                                                                                                                                                                                                                                                                                                                                                                                                                                                                     |
| 39 | otn | Other Transport Equipment: Manufacture of other transport equipment                                                                                                                                                                                                                                                                                                                                                                                                                                                                                                                                                           |
| 40 | ele | Electronic Equipment: office, accounting and computing machinery, radio, television and communication equipment and apparatus                                                                                                                                                                                                                                                                                                                                                                                                                                                                                                 |
| 41 | ome | Other Machinery & Equipment: electrical machinery and apparatus n.e.c., medical, precision and optical instruments, watches and clocks                                                                                                                                                                                                                                                                                                                                                                                                                                                                                        |
| 42 | omf | Other Manufacturing: includes recycling                                                                                                                                                                                                                                                                                                                                                                                                                                                                                                                                                                                       |
| 43 | ely | Electricity: production, collection and distribution                                                                                                                                                                                                                                                                                                                                                                                                                                                                                                                                                                          |
| 44 | gdt | Gas Distribution: distribution of gaseous fuels through mains; steam and hot water supply                                                                                                                                                                                                                                                                                                                                                                                                                                                                                                                                     |
| 45 | wtr | Water: collection, purification and distribution                                                                                                                                                                                                                                                                                                                                                                                                                                                                                                                                                                              |
| 46 | cns | Construction: building houses factories offices and roads                                                                                                                                                                                                                                                                                                                                                                                                                                                                                                                                                                     |
| 47 | trd | Trade: all retail sales; wholesale trade and commission trade; hotels and restaurants; repairs of motor vehicles and personal and household goods; retail sale of automotive fuel                                                                                                                                                                                                                                                                                                                                                                                                                                             |
| 48 | otp | Other Transport: road, rail; pipelines, auxiliary transport activities; travel agencies                                                                                                                                                                                                                                                                                                                                                                                                                                                                                                                                       |
| 49 | wtp | Water transport                                                                                                                                                                                                                                                                                                                                                                                                                                                                                                                                                                                                               |
| 50 | atp | Air transport                                                                                                                                                                                                                                                                                                                                                                                                                                                                                                                                                                                                                 |
| 51 | cmn | Communications: post and telecommunications                                                                                                                                                                                                                                                                                                                                                                                                                                                                                                                                                                                   |
| 52 | ofi | Other Financial Intermediation: includes auxiliary activities but not insurance and pension funding (see next)                                                                                                                                                                                                                                                                                                                                                                                                                                                                                                                |
| 53 | isr | Insurance: includes pension funding, except compulsory social security                                                                                                                                                                                                                                                                                                                                                                                                                                                                                                                                                        |
| 54 | obs | Other Business Services: real estate, renting and business activities                                                                                                                                                                                                                                                                                                                                                                                                                                                                                                                                                         |
| 55 | ros | Recreation & Other Services: recreational, cultural and sporting activities, other service activities; private households with employed persons (servants)                                                                                                                                                                                                                                                                                                                                                                                                                                                                    |
| 56 | osg | Other Services (Government): public administration and defense; compulsory social security, education, health and social work, sewage and refuse disposal, sanitation and similar activities, activities of membership organizations n.e.c., extra-territorial organizations and bodies                                                                                                                                                                                                                                                                                                                                       |
| 57 | dwe | Dwellings: ownership of dwellings (imputed rents of houses occupied by owners)                                                                                                                                                                                                                                                                                                                                                                                                                                                                                                                                                |

## 1.2. "Particularities of the construction of the input-output table of the study sites"

### 1.2.1. The Volta delta

The main information that allows doing the regionalization are the District Analytical Reports (by each of the 10 districts, GSS, 2014). In particular, the "Table 4.4: Employed population 15 years and older by Industry and sex" and "Table 4.3: Employed population 15 years and older by occupation and sex", complemented by other information<sup>3</sup>. With these tables, for the Volta delta in Ghana, we apportion the employment by category type (lab, mgr, tec, clk, srv, which are the unskilled and skilled categories of GTAP 9<sup>4</sup>) and sector (each of the 57 sectors). On the one hand, we have the employment by district and gender (male/female) for 21 sectors, which are split to 57 (the agricultural sector is disaggregated based on the particular info of the table "Table 7.1: Households by agricultural activities and locality" and the agricultural production data (MOFA, 2015); while the rest of the sectors are split in the same proportion than the equivalent split of 21 to 57 at the national level of Ghana, which is given in the Labour force survey that the International Labour Organization gathers (ILO, 2015). At this national level, it exists the information of the employment by category type (lab, mgr, tec, clk, srv) by each of the 21 sectors (ILO, 2015). But for the districts we only have the total by category type (lab, mgr, tec, clk, srv), not knowing for which of the 21 districts it belongs. One could split this employment by category type as for the nation (Ghana), but then the employment by each of the 57 sectors already obtained would not be matched. That is why the RAS approach for this 5x57 employment table is needed, to match the totals by category type, and at the same time by sector (already obtained as explained above for the 57 of GTAP)<sup>5</sup>. Other key data for the construction of the IO table, in particular the agricultural sector, are the agricultural land uses, production, prices, data of livestock numbers and keepers (MOFA, 2015), for fisheries, the FAO and Fisheries report 2012; climatic data, etc. is obtained from the Ghana Meteorological Agency (2014).

### 1.2.2. The Mahanadi delta

The main information that allows doing the regionalization are the (PCA, 2011), (GoO, 2013), (GoO, 2016). With these tables, for the Mahanadi delta in India, a RAS type approach is performed to apportion the employment by category (skill) type, gender and sector (each of the 57 sectors). On the one hand, we have the employment by district and gender (male/female) for the main 12 activities/sectors<sup>6</sup>, which are split to 57; the agricultural sector is disaggregated based on the

<sup>3</sup> "Table 7.1: Households by agricultural activities and locality", "Table 4.6: Employed population 15 years and older by employment sector and sex", "Table 4.5: "Employed population 15 years and older by employment status and sex", "Table 2.1: Population by age, sex and type of locality" (to capture demography), "Table 4.1: Population 15 years and older by activity status and sex" (to connect the demography with employment), "Table 2.5: Birthplace by duration of residence of migrants" (to capture migration)".

<sup>4</sup> Lab: All other workers (previously classified as unskilled in GTAP 8), mgr: Managers and professionals, tec: Technicians and associate professionals, clk: Clerical support workers, srv: Service and sales workers.

<sup>5</sup> Finally, at the national level, some small corrections are applied to the employment data in order to obtain (as the ratio of the labour rows in GTAP and the employment of people) and match reasonable wages, when they do not reach a minimum of 100\$ per year (e.g. as it occurs with the original data of the wage of unskilled labour in the transport sectors) or exceed the maximum of 200,000\$ per year (e.g. as it occurred with the wage of the Managers & professionals in the transport sector and Technicians & associate professionals in Dwellings sector).

<sup>6</sup> Cultivators; Agricultural labourers; Plantation, Livestock, Forestry, Fishing, Hunting & allied activities; Mining & Quarrying; Manufacturing; Electricity, Gas & Water Supply; Construction; Wholesale & Retail Trade; Hotels &



particular info, while the rest of the sectors are split in the same proportion than the equivalent split of 12 to 57 at the national level of India, which is given in the Labour force survey that the ILO gathers, (ILO 2015). At the national level, some small corrections are applied to the employment data in order to obtain reasonable wages, when they do not reach a minimum of 40\$ per year (e.g. as it occurs with the original data of the wage of unskilled labour in the transport sectors) or exceed the maximum of 200,000\$ per year (e.g. as it occurred with the original data of the wage of the Dwellings sector). Other key data for the construction of the IO table, in particular the agricultural sector, are the agricultural land uses, production, prices, data of livestock, fisheries, etc. The info on geography, climate and environment is obtained from several sources such as the reports on land use from the Directorate of Economics and Statistics (GoO) and others: (Banerjee, R., 1986; GoO, 2015; Manmohan; PCA-Odisha, (2001 & 2011); Srikanta; Vinod and Bhattacharya, 2013). Also previous background was obtained from (GoO, 1986), (Ray, 1988), (Ray and Mohanti, 1989).

### 1.2.3. The Indian Bengal delta

The key and very complete information that allows completing many vectors of the IO table and doing the regionalization is (BAES, 2012). Also some information, such as the employment and expenditure data is obtained by (PCA, 2011), and then the rest is complemented with other information, notably on the biophysics and challenges of climate change, such as from (Ghosh and Chaudhuri 2012; TEEB 2010), and (Guha and Ghosh, 2009). Key information such as that of the District Statistical Handbook or the Agricultural data is also referenced from (BAES, 2012), since we got a complete dataset of the North 24 Parganas and South 24 Parganas from the Government of West Bengal. This included detailed information by sector on value added, production (in the case of agriculture, not only production but also surface and productivity data by crop), consumption, etc., but also on intermediate goods provision, such as water and electricity.

With these information, a RAS type approach is performed to apportion the employment by category (skill) type, gender and sector (each of the 57 sectors). On the one hand, we have the employment by district and gender (male/female) for the main 12 activities/sectors (see footnote 9), which are split to 57 (the agricultural sector is disaggregated based on the particular info; while the rest of the sectors are split in the same proportion than the equivalent split of 12 to 57 at the national level of India, which is given in the Labour force survey that the ILO gathers, (ILO 2015). At the national level, some small corrections are applied to the employment data in order to obtain (as the ratio of the labour rows in GTAP and the employment of people) reasonable wages, when they do not reach a minimum of 40\$ per year (e.g. as it occurs with the original data of the wage of unskilled labour in the transport sectors) or exceed the maximum of 200,000\$ per year (e.g. as it occurred with the original data of the wage of the Dwellings sector).

Other key data for the construction of the IO table, in particular the agricultural sector, are the land uses, production, prices, data of livestock, fisheries, etc. The data on geography, climate and environment is obtained from several sources such as (Danda et al. 2011), (SDMBRI 1996; Sarkar and Bhattacharya 2003), (Hazra et al. 2002), (Hazra 2010), (Singh 2007).

### 1.2.4. The Bangladeshi Bengal delta

The main information that allows doing the regionalization are the Bangladesh Statistical Year Book (BBS, 2014), Labour Force Survey of 2010 and 2013 (BBS-LFS, 2012), Bangladesh Bureau of Statistics, Alliance (2015), Household Income and Expenditure Survey (HIES, 2010), Bangladesh Planning Commission, data up to 2014, and Input-Output Table of Bangladesh (data up to 2012).

With this information, a RAS approach is performed to apportion the employment by category type (lab, mgr, tec, clk, srv) and sector (each of the 57 sectors). On the one hand, we have the employment by district and gender (male/female) for the main 12 activities/sectors from ILO, which



are split to 57 (the agricultural sector is disaggregated based on the particular info; while the rest of the sectors are split in the same proportion than the equivalent split of 12 to 57 at the national level of Bangladesh, which is also (apart from the BBS-LFS, 2012), given in the Labour force survey that the ILO gathers, (ILO 2015). For the districts we only have the total by category type, not knowing for which of the 12 districts it belongs. In the Labor Force Survey of Bangladesh for 2010, also employment (by gender and skill) was available at more than 20 categories. Finally, some small corrections are applied to the employment data in order to obtain (as the ratio of the labour rows in GTAP and the employment of people) reasonable wages (see footnote 8). Other key data for the construction of the IO table, in particular the agricultural sector, are the agricultural land uses, production, prices, data of livestock, fisheries, etc. as well as geographical data as shown above.

For the elaboration of the delta and non-delta parts of the table of Bangladesh, it is also worth pointing out the important use (apart from the Bangladesh Social Accounting Matrix 2006/07, prepared by the Bangladesh Planning Commission, which is the main data feed in GTAP) of the national IOT 2012, which had 86 sectors before aggregating them to the 57 GTAP sectors. We may also highlight the elaboration of the private consumption vector (and actually of 5 income groups) from the Household Income and Expenditure Survey for 2010 (also elaborated by the Bangladesh Bureau of Statistics in 2011). From this survey, the consumption was obtained (and then transformed to the corresponding price valuation and aggregated) from the original 327 items of both food and non-food goods. Additional useful information was the Bangladesh Statistical Year Book of 2014, prepared by Bangladesh Bureau of Statistics, the Economic Survey of Bangladesh, prepared by the Ministry of Finance (2014).

Figure S5: Land use distribution of the Volta delta.

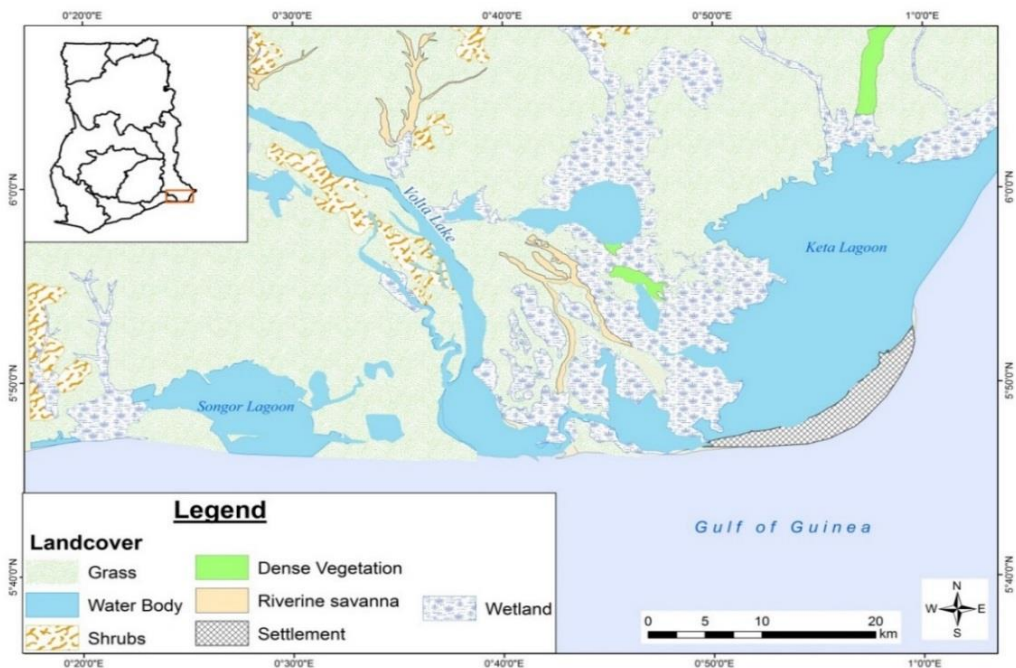

Source: DECCMA WP2 team at Geodata (Southampton).

Figure S6: Land use / Land Cover of Mahanadi delta.

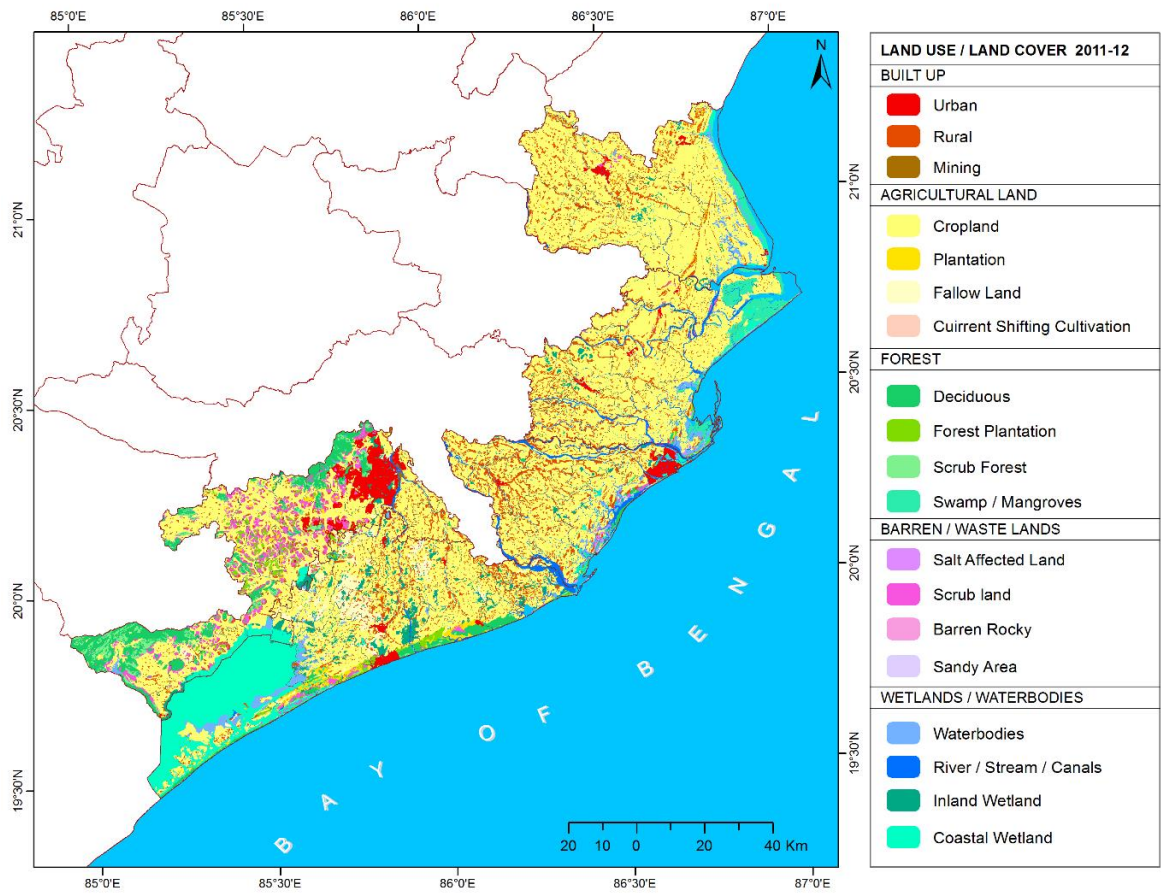

Figure S7: Landuse / Land cover Map of IB delta.

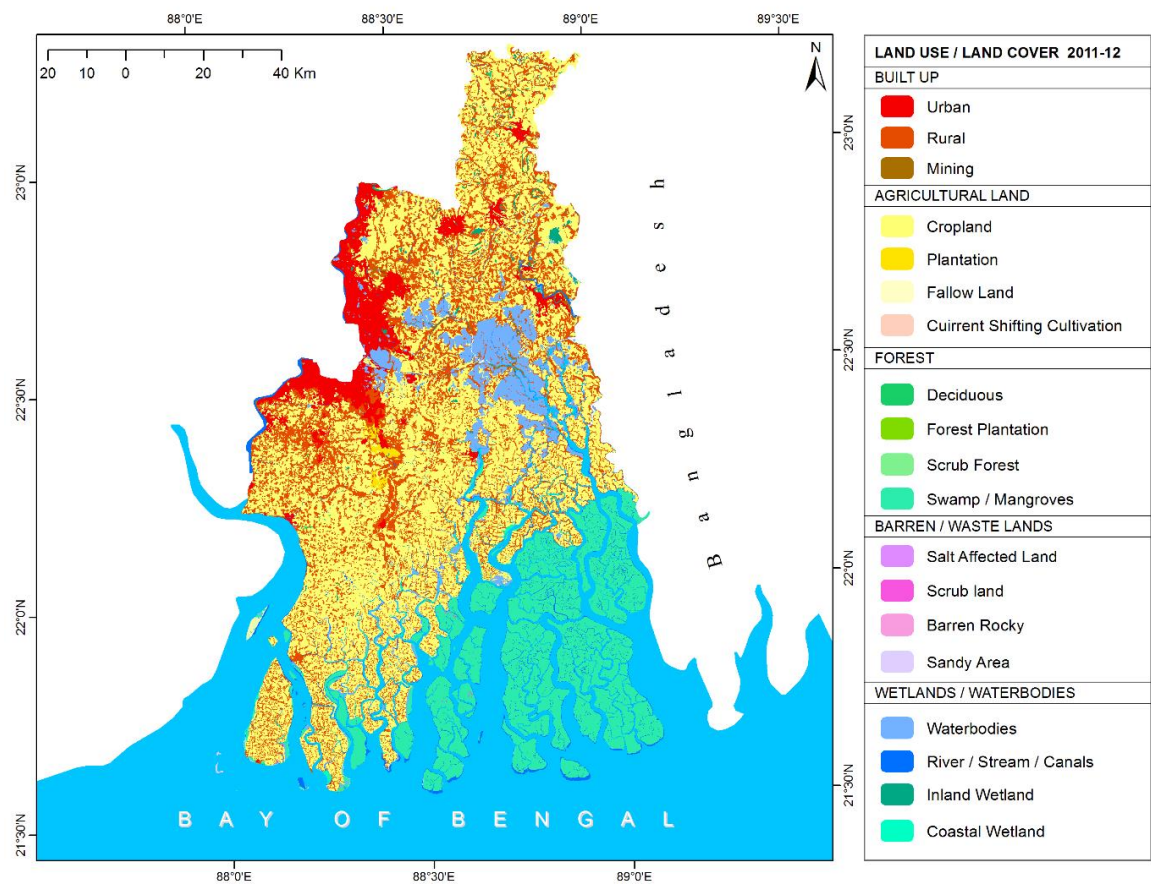

Source: National Remote Sensing Centre (NRSC), ISRO, India.



239

Figure S8: Agro-ecological zones of Bangladesh (includes the BB delta definition).

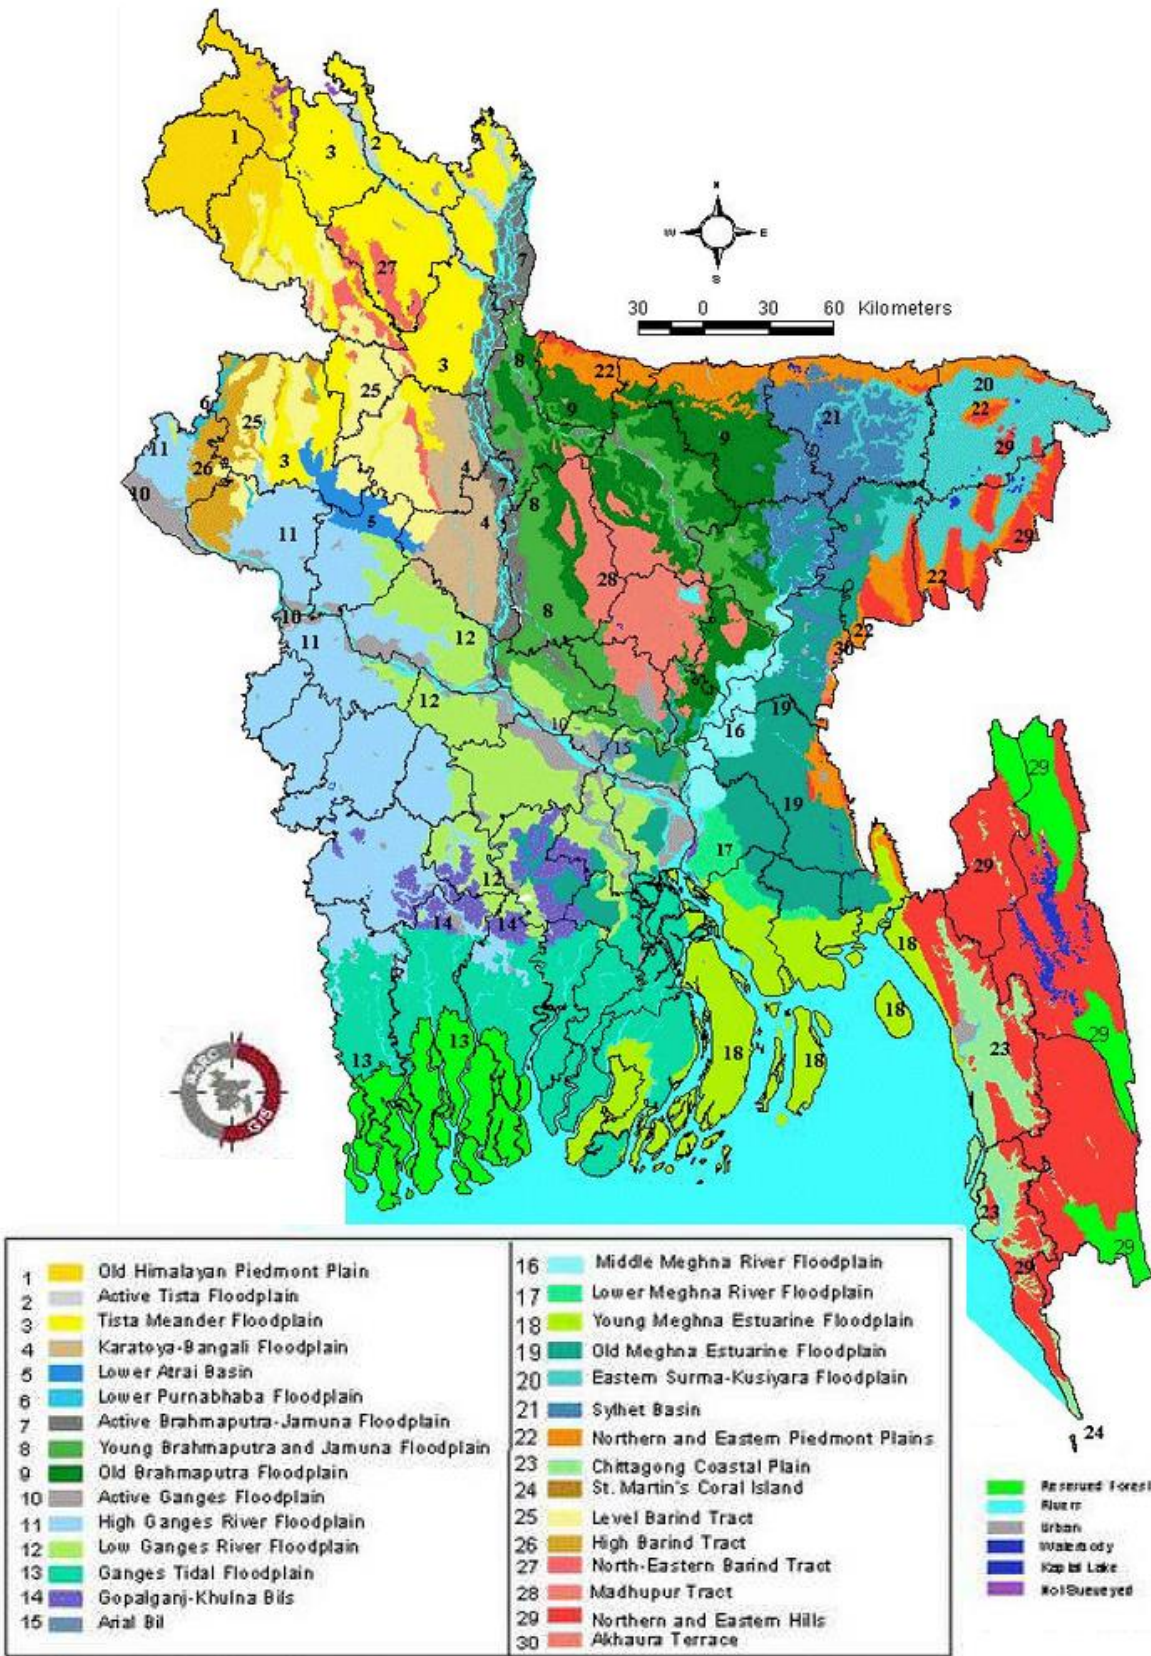

240

241

Source : BARC-GIS Project.

Figure S9. Distribution of Value Added by main 16 categories for the deltas.

a) Volta delta

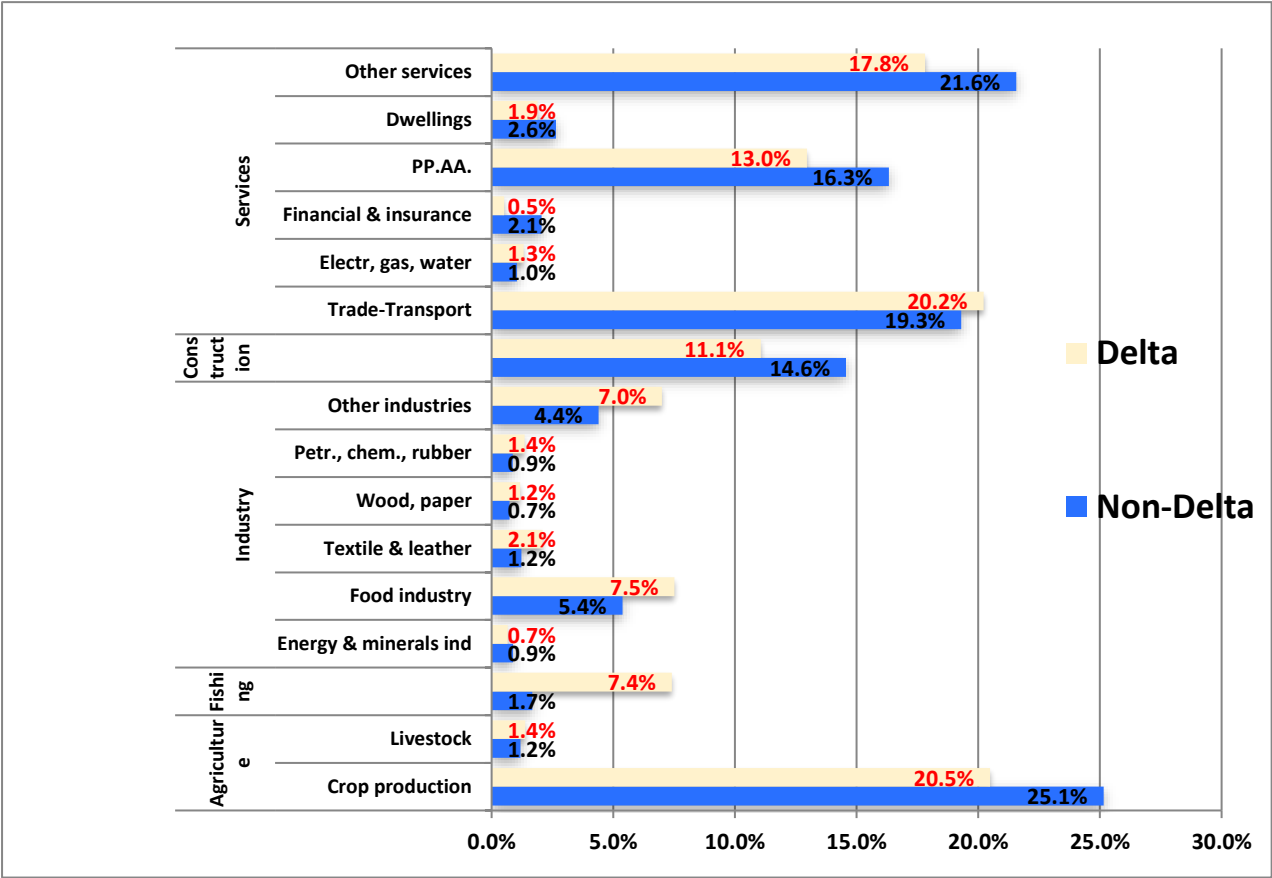

b) Mahanadi delta

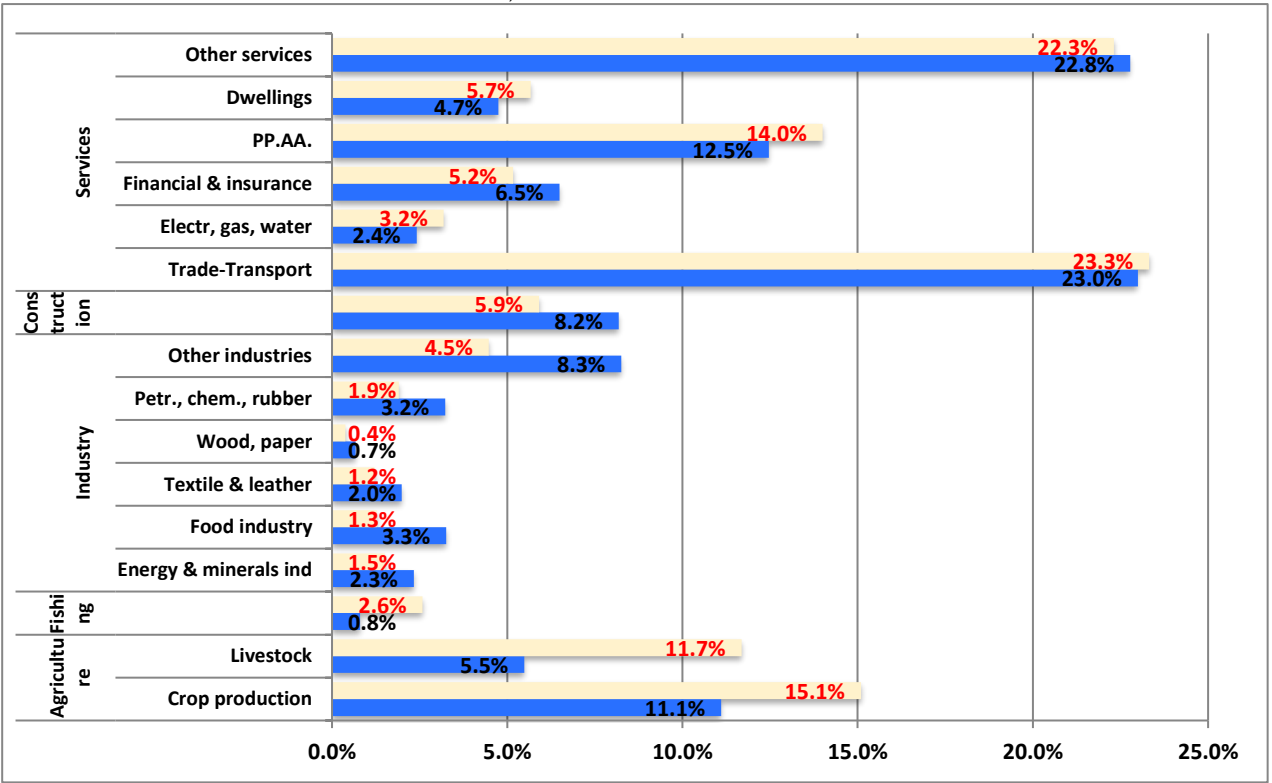

c) IB delta

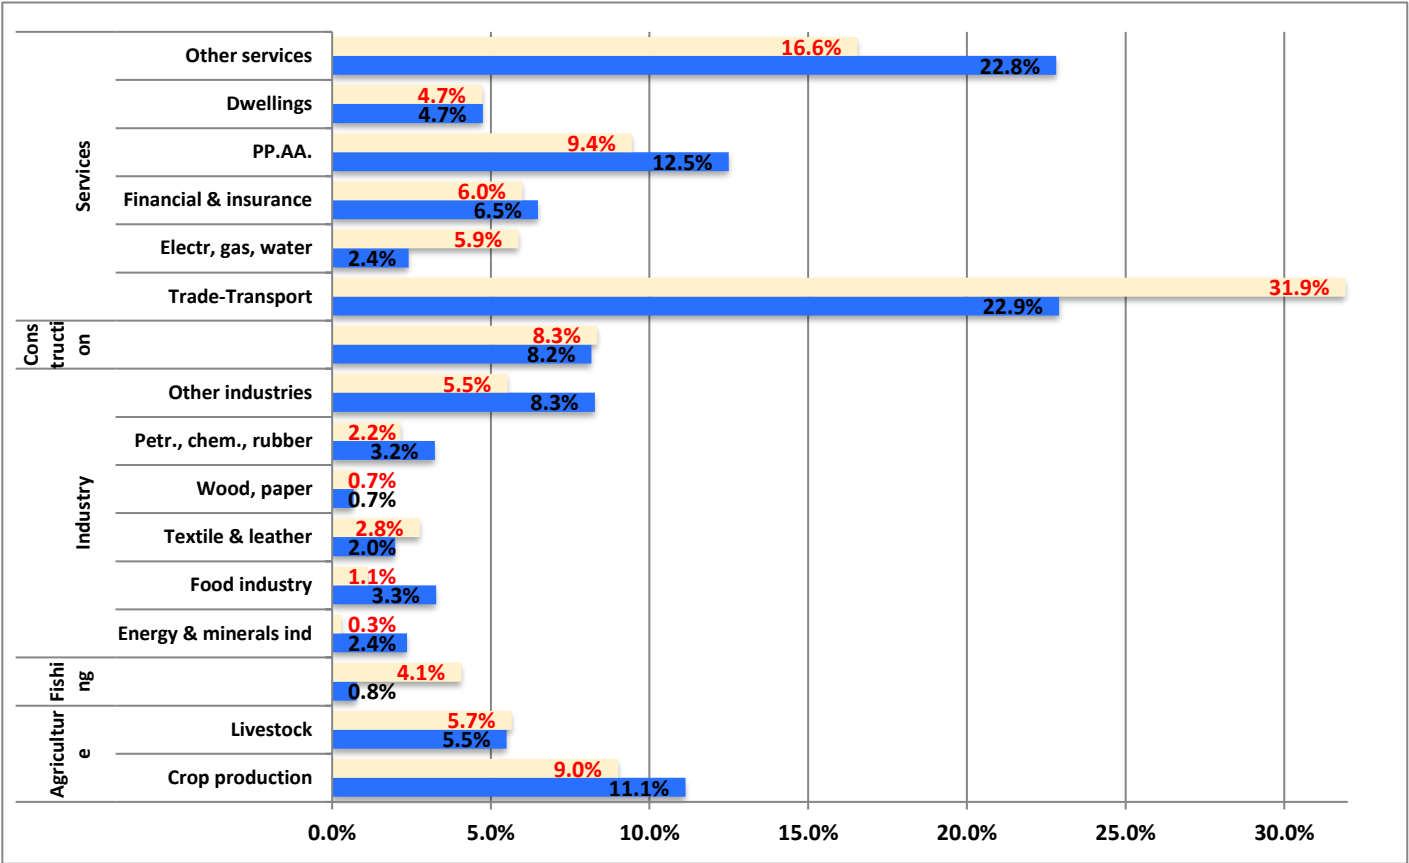

d) BB delta

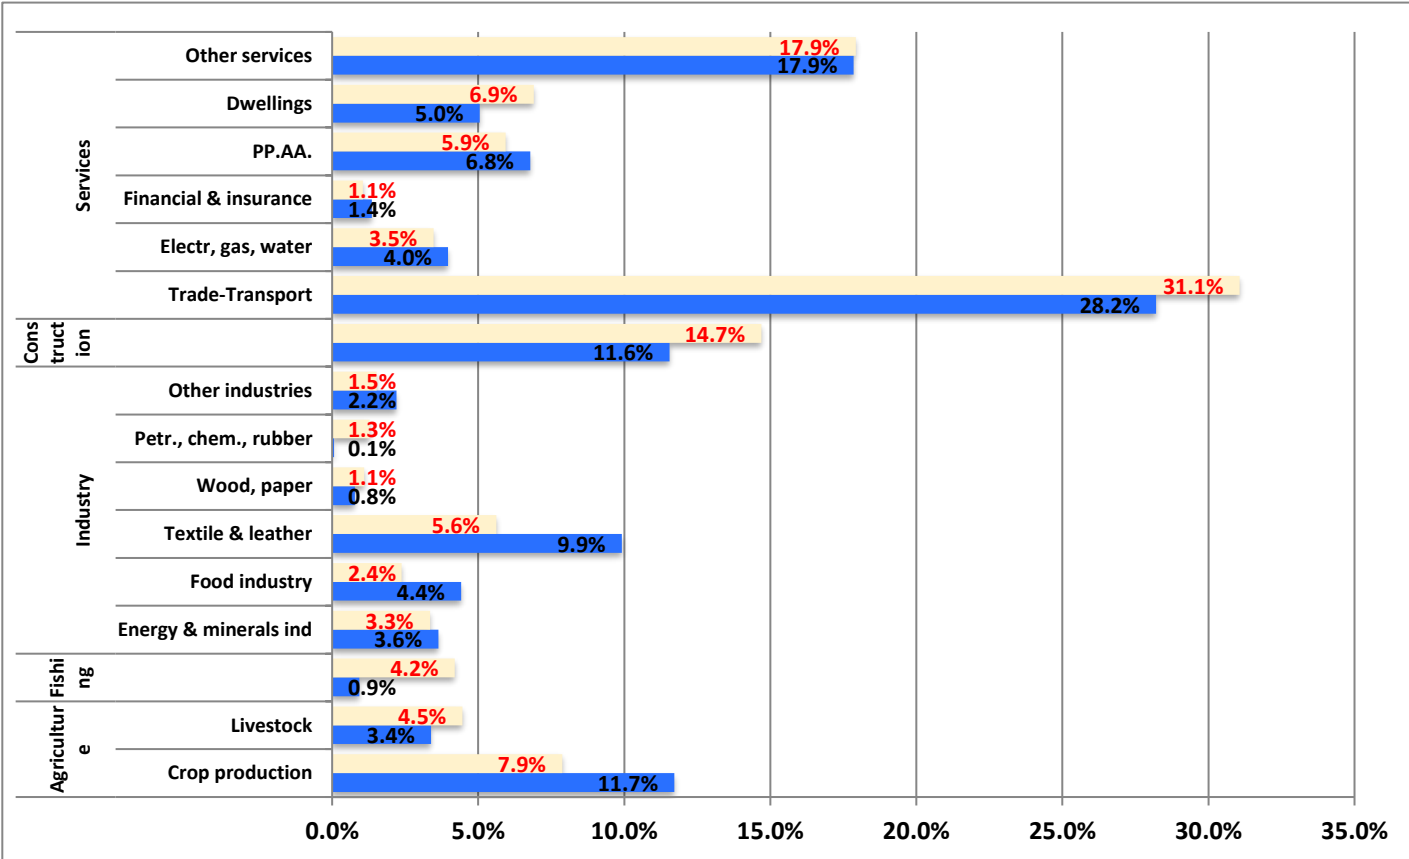

Source: Own elaboration from the computation of VA in the input-output table of the delta and Rest of the country.

**Figures S10.** Employment of the delta and non-delta (x axis) by demanding region (y-axis, being represented the delta in orange, non-delta in blue, and RoW in grey)

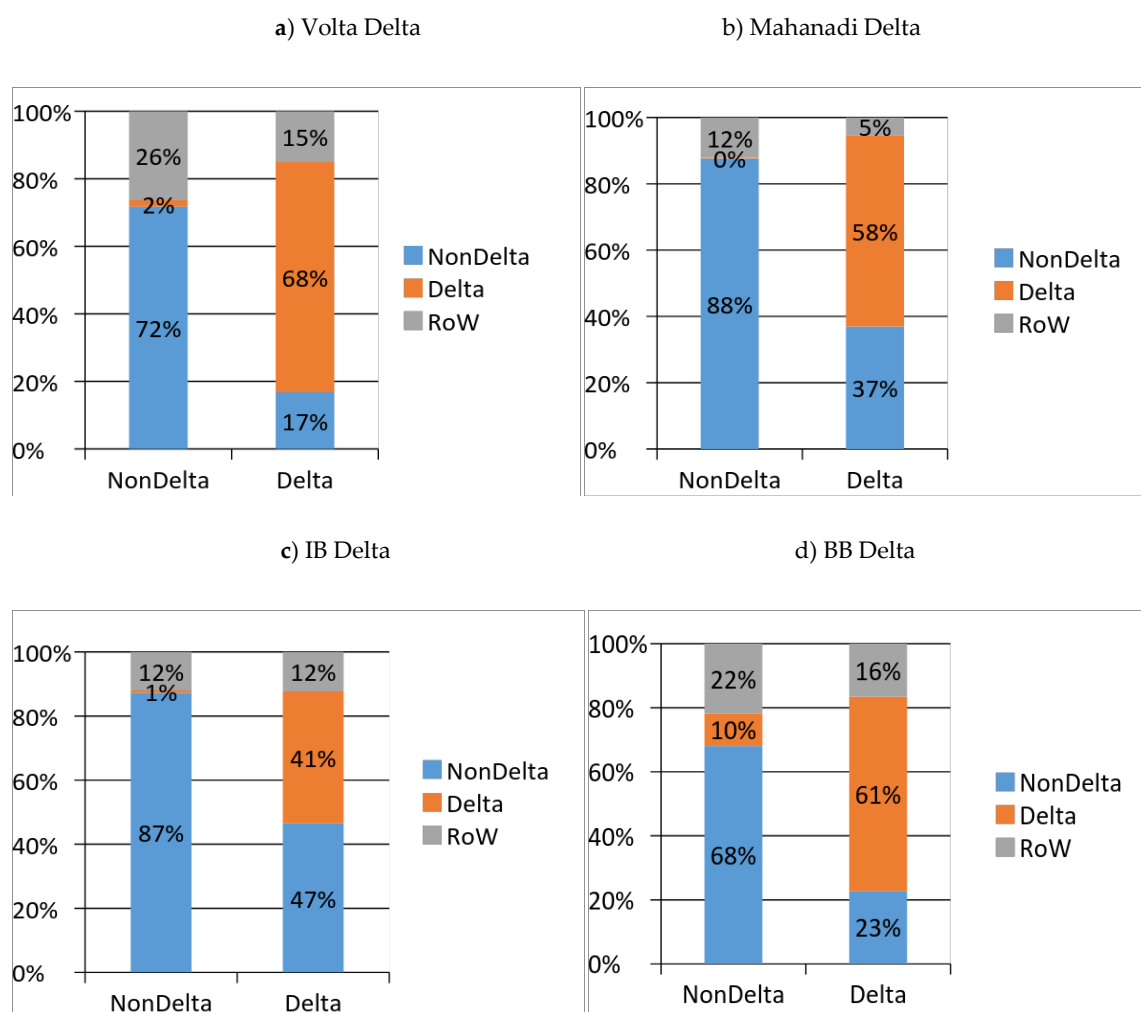



**Figures S11.** Employment (1000 people) of the delta by demanding region and sector

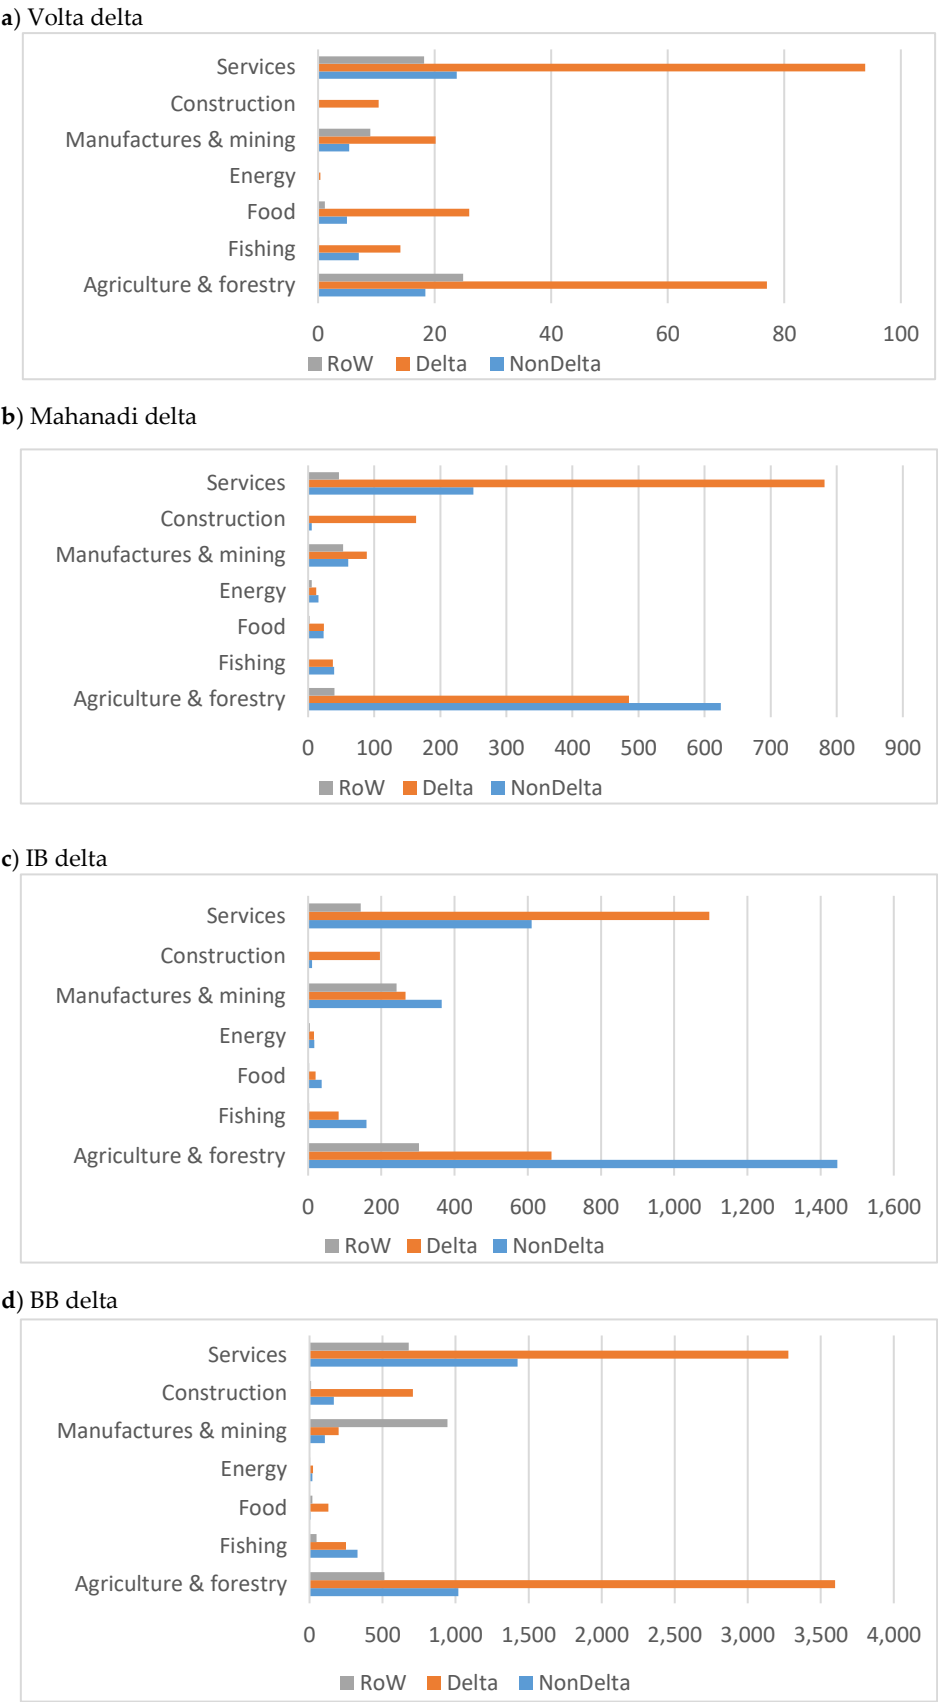

Source: Own elaboration from the computations with the IO table and extensions of the delta and Rest of the country.

**Figures S12:** Employment (share per 1) by gender of the Non-Delta and Delta (x axis) by demanding region (y-axis, being represented the delta in orange, non-delta in blue, and RoW in grey)

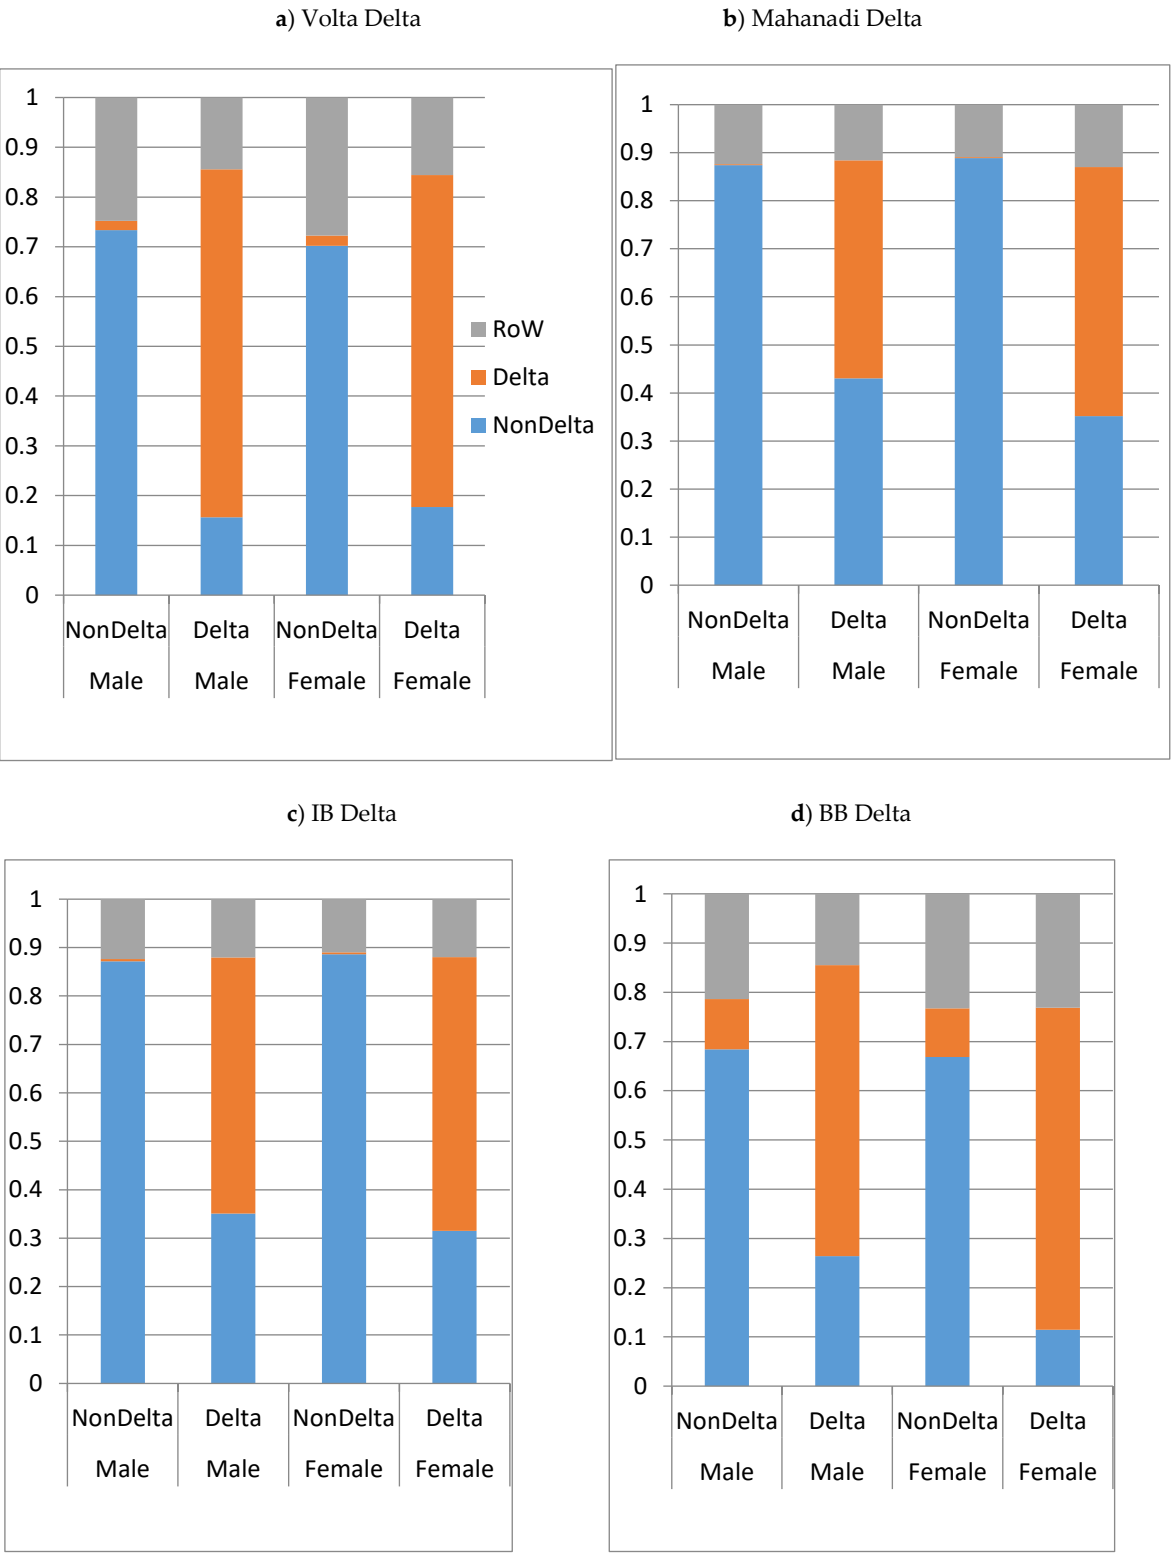

Source: Elaboration from the computations with the IO table and extensions of the Delta and Rest of the country

Figures S13: Direct and embodied labour by sector and gender in the Non-Delta and Delta

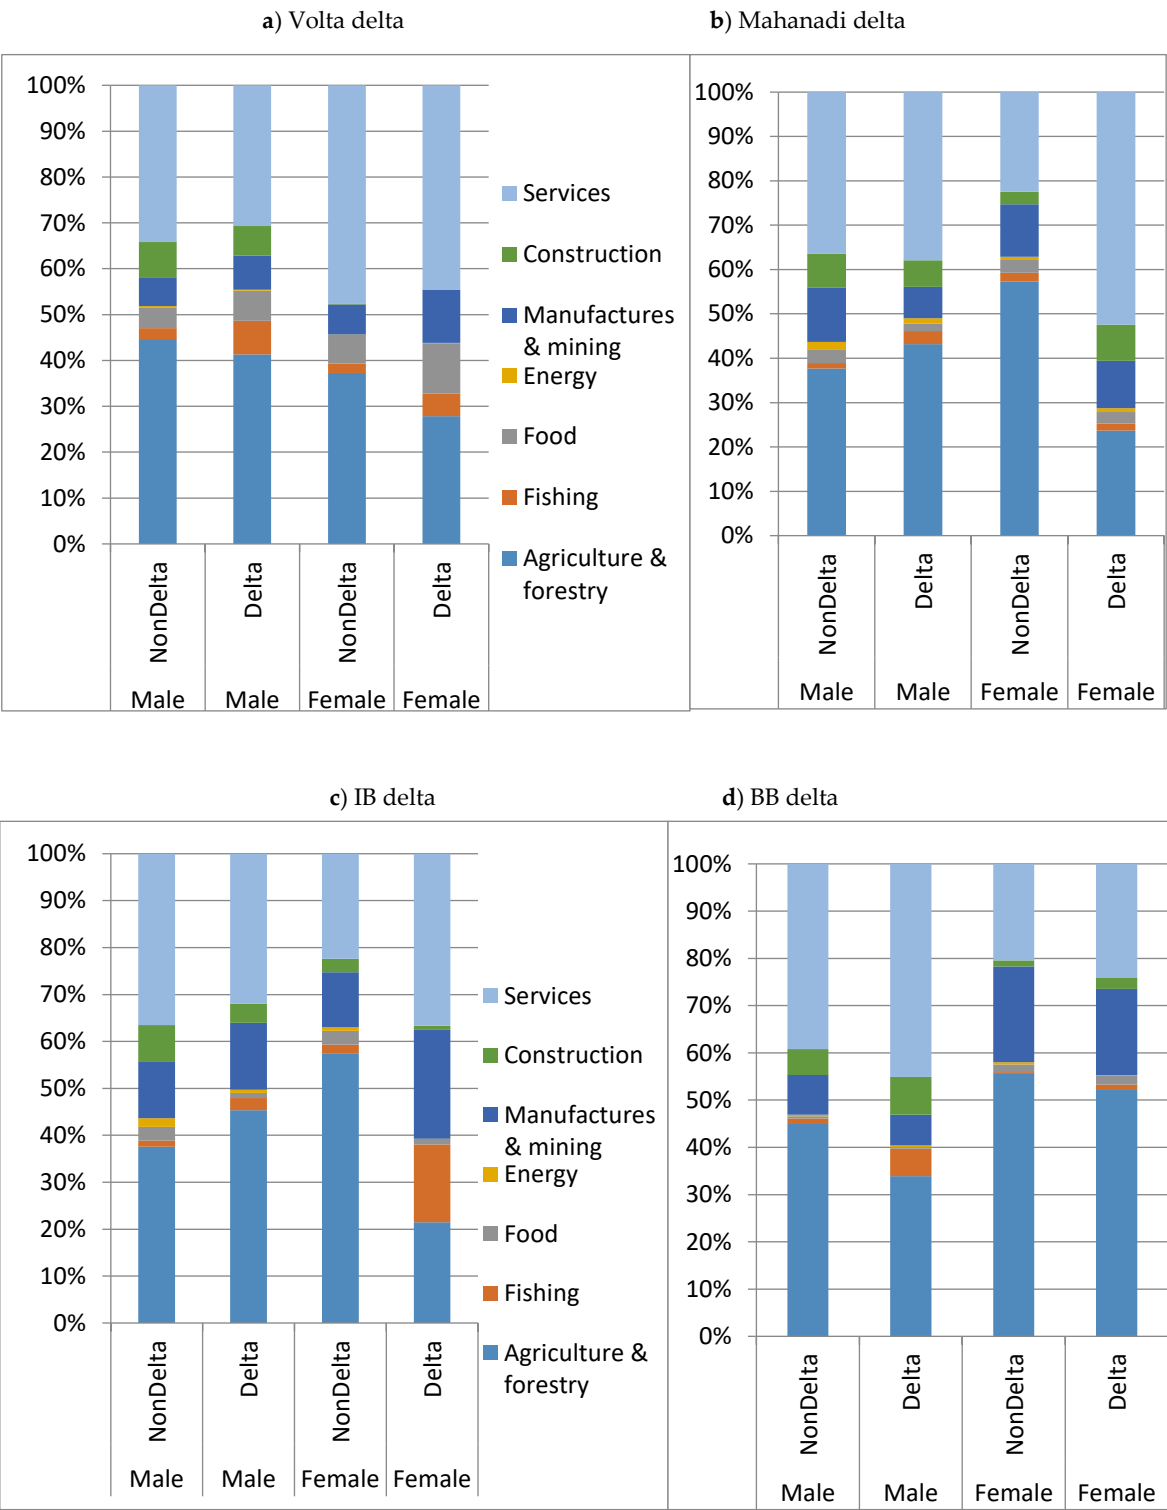

Source: Elaboration from the computations with the IO table and extensions of the delta and Rest of the country.

Table S2. Summary of import, export and footprints

## a) Volta delta

|                                     | Direct in<br>production | Embodied<br>exports | Embodied<br>imports | Net trade<br>(E-M) | Footprint |
|-------------------------------------|-------------------------|---------------------|---------------------|--------------------|-----------|
| Delta. Employment (1000 people)     | 355                     | 113                 | 318                 | -205               | 560       |
| Delta. Land (1000 hectares)         | 670                     | 222                 | 612                 | -390               | 1060      |
| Delta. Energy (Mtoe)                | 0.1                     | 0.0                 | 0.1                 | -0.1               | 0.2       |
| Delta. CO2(Mt CO2)                  | 0.1                     | 0.0                 | 0.1                 | -0.1               | 0.2       |
| Non-Delta. Employment (1000 people) | 9,576                   | 2,706               | 2,624               | 83                 | 9,493     |
| Non-Delta. Land (1000 hectares)     | 17,990                  | 4,618               | 4,434               | 184                | 17,806    |
| Non-Delta. Energy (Mtoe)            | 2                       | 1                   | 1                   | 0                  | 2         |
| Non-Delta. CO2 (Mt CO2)             | 2                       | 1                   | 1                   | 0                  | 2         |

Source: Own elaboration from the computations with the IO table and extensions of the delta and Rest of the country.

## b) Mahanadi delta

|                                     | Direct in<br>production | Embodied<br>exports | Embodied<br>imports | Net trade<br>(E-M) | Footprint |
|-------------------------------------|-------------------------|---------------------|---------------------|--------------------|-----------|
| Delta. Employment (1000 people)     | 2,760                   | 1,167               | 1,745               | -578               | 3,338     |
| Delta. Land (1000 hectares)         | 1,518                   | 967                 | 627                 | 340                | 1178      |
| Delta. Energy (Mtoe)                | 0.4                     | 0.2                 | 0.3                 | -0.2               | 0.6       |
| Delta. CO2(Mt CO2)                  | 2.3                     | 1.2                 | 2.2                 | -1.0               | 3.3       |
| Non-Delta. Employment (1000 people) | 454,135                 | 56,086              | 55,965              | 121                | 454,014   |
| Non-Delta. Land (1000 hectares)     | 219,306                 | 24,485              | 24,443              | 42                 | 219,264   |
| Non-Delta. Energy (Mtoe)            | 260                     | 61                  | 60                  | 0                  | 260       |
| Non-Delta. CO2 (Mt CO2)             | 1,311                   | 230                 | 229                 | 1                  | 1310      |

Source: Own elaboration from the computations with the IO table and extensions of the delta and Rest of the country.

## c) IB delta

|                                     | Direct in<br>production | Embodied<br>exports | Embodied<br>imports | Net trade<br>(E-M) | Footprint |
|-------------------------------------|-------------------------|---------------------|---------------------|--------------------|-----------|
| Delta. Employment (1000 people)     | 5,688                   | 3,346               | 2,923               | 423                | 5,265     |
| Delta. Land (1000 hectares)         | 1,670                   | 1,204               | 778                 | 426                | 1244      |
| Delta. Energy (Mtoe)                | 1.6                     | 0.9                 | 1.5                 | -0.6               | 2.2       |
| Delta. CO2(Mt CO2)                  | 10.9                    | 5.9                 | 9.5                 | -3.6               | 14.5      |
| Non-Delta. Employment (1000 people) | 451,111                 | 57,560              | 56,986              | 574                | 450,537   |
| Non-Delta. Land (1000 hectares)     | 219,385                 | 25,507              | 25,169              | 339                | 219,046   |
| Non-Delta. Energy (Mtoe)            | 258                     | 62                  | 61                  | 1                  | 257       |
| Non-Delta. CO2 (Mt CO2)             | 1,301                   | 236                 | 231                 | 5                  | 1296      |

Source: Own elaboration from the computations with the IO table and extensions of the delta and Rest of the country.

## d) BB delta

|                                     | Direct in<br>production | Embodied<br>exports | Embodied<br>imports | Net trade<br>(E-M) | Footprint |
|-------------------------------------|-------------------------|---------------------|---------------------|--------------------|-----------|
| Delta. Employment (1000 people)     | 13,473                  | 5,287               | 9,259               | -3,973             | 17,446    |
| Delta. Land (1000 hectares)         | 3,994                   | 1,192               | 2,877               | -1,685             | 5679      |
| Delta. Energy (Mtoe)                | 1.2                     | 0.6                 | 0.8                 | -0.2               | 1.4       |
| Delta. CO2(Mt CO2)                  | 11.4                    | 5.3                 | 7.5                 | -2.2               | 13.6      |
| Non-Delta. Employment (1000 people) | 41,363                  | 13,206              | 11,393              | 1,813              | 39,550    |
| Non-Delta. Land (1000 hectares)     | 14,990                  | 2,358               | 2,170               | 188                | 14,802    |
| Non-Delta. Energy (Mtoe)            | 3                       | 1                   | 1                   | 0                  | 3         |
| Non-Delta. CO2 (Mt CO2)             | 22                      | 5                   | 4                   | 2                  | 20        |

Source: Own elaboration from the computations with the IO table and extensions of the delta and Rest of the country.

## References of the Supplementary Material

- Afifi, T. and Warner, K. 2008. The Impact of Environmental Degradation on Migration Flows across Countries. WP 5/2008. UNU-EHS Working Paper Series. Bonn: United Nations University.
- Alauddin, M., Sarker, A. R. 2014. Climate change and farm-level adaptation decisions and strategies in drought-prone and groundwater-depleted areas of Bangladesh: an empirical investigation, *Ecological Economics*, 106, pp. 204-213.
- Allersma, E. and W.M.K. Tilmans 1993 Coastal conditions in West Africa - a review. *Ocean and Coastal Management* 19:199-240.
- Appeaning Addo, K. 2015. Assessment of the Volta Delta Shoreline Change. *Journal of Coastal Zone Management* 18(3).
- Awadzi, T. W, Ahiabor, E, Breuning-Madsen, H (2008). The Soil-Land Use System in a Sand Spit Area in the Semi-arid Coastal Savanna region of Ghana- Development, Sustainability and Threats. *West African Journal of Ecology*. 13:132-143.
- BAES, 2012. Bureau of Applied Economics and Statistics, Department of Statistics and Programme implementation, Government of West Bengal, West Bengal India.
- Banerjee, R. 1986. Landuse and landform studies of the Mahanadi river delta with the help of satellite MSS band'. NATMO, Calcutta, India.
- Banerjee, K. 2013. Decadal Change in the Surface Water Salinity Profile of Indian Sundarbans: A Potential Indicator of Climate Change. *J Marine Sci Res Development* S11:002.
- BBS-LFS. 2012. Bangladesh - Labour Force Survey 2010: Bangladesh Bureau of Statistics (BBS) - Ministry of Planning.
- BBS. 2014. Statistical Year Book, 2012. Bangladesh: Bangladesh Bureau of Statistics (BBS), Statistics & Informatics Division (SID), Ministry of planning government of the People's republic of Bangladesh, Dhaka, Bangladesh.
- Black, R. Adger, N.W., Nigel, W.A., Dercon, S., Geddes, A. and Thomas, D. 2011. The effect of environmental change on human migration. *Global Environmental Change* 21: 3-11.
- Dasgupta, S., Huq, M., Mustafa, G., Sobhan, I., Wheeler, D. 2017. The Impact of Aquatic Salinization on Fish Habitats and Poor Communities in a Changing Climate: Evidence from Southwest Coastal Bangladesh, In *Ecological Economics*, 139, pp. 128-139.
- Danda, A. A., G., A. Srisanthan, J. Ghosh, Bandyopadhyay, and S. Hazra. 2011. *Indian Sundarbans delta: A Vision*. New Delhi: World Wide Fund for Nature-India.
- DECCMA-WP2, 2017. DECCMA study sites maps. Work of Work Package 2 (Hill et al.) in the project DELtas, vulnerability and Climate Change: Migration and Adaptation.
- Ghana Meteorological Agency. 2014. Districts Weather Information. [www.meteo.gov.gh](http://www.meteo.gov.gh)
- Ghosh, A. and J. Chaudhuri. 2012. *Living with changing climate: Impact, vulnerability and adaptation challenges in Indian Sundarbans*. New Delhi: Centre for Science and Environment.
- GoO. 1986. delta Development Plan Mahanadi delta Command Area: Geology Geomorphology and Coast Building, Vol. IV. Unpublished Report with Engineer in-chief, Irrigation Department. Directorate of Agriculture & Food Production, Government of Orissa, Bhubaneswar, Orissa.
- GoO. 2013. Odisha Agriculture Statistics 2011-12. Directorate of Agriculture & Food Production, Government of Odisha, Bhubaneswar, Odisha.

- GoO. 2015. Odisha Economic Survey 2013-2014, Planning and Coordination Department, GoO, Odisha, India.
- GoO. 2016. Odisha Economic Survey(s), 2011-12, 2013-14, 2014-15. Planning & Coordination Department, Bhubaneswar, Printed at Odisha Government Press. Government of Odisha, Cuttack, Odisha.
- GSS. 2014. 2010 Population and Housing Census. (Ada East, Ada West, Akatsi South, Central Tongu, Keta Municipal, Ketu North, Ketu South, Ningo Prampram, North Tongu, South Tongu). District Analytical Reports. Ghana Statistical Service.
- Guha, I., Ghosh, S. 2009. A Glimpse of the Tiger: How much are Indians Willing to pay for it? , SANDEE Working Paper No.39-09.
- Hazra, S. 2010. Temporal change detection (2001-2008) of the Sundarban: WWF-India.
- Hazra, S., T. Ghosh, R. D. Gupta, and G. Sen. 2002. Sea level and associated changes in the Sundarbans. *Science and Culture* 68(9-12): 309-321.
- HIES. 2015. Report of the Household Income & Expenditure Survey (HIES) 2010: Bangladesh Bureau of Statistics (BBS) - Ministry of Planning.
- ILO. 2015. Yearly indicators. Ghana, India and Bangladesh: "Population census", "Living Standards Survey", "Labour force survey", "Survey of Employment and Earnings": International Labour Organization.
- IWM. 2007. Investigating the Impact of Relative Sea-Level Rise on Coastal Communities and their Livelihoods in Bangladesh.
- IWM. 2008. Impact Assessment of Climate Change and Sea Level Rise on Monsoon Flooding.
- Manmohan, M., Mahanadi river delta, East coast of India: an overview on evolution and dynamic processes'. Dept. of Geology, Utkal University, Bhubaneswar, India.
- MOFA. 2015. Agricultural Statistics. Statistics, Research and Information Directorate, Ministry of Food and Agriculture, Ghana.
- PCA- 2011. Primary Census Abstract. Census of India, Directorate of Census Operations, Government of India, New Delhi.
- PCA-Odisha. 2001 & 2011. Primary Census Abstract (PCA)-Odisha, Census of India (2001 & 2011). Government of India.
- Ray, S.B. 1988. Sedimentological and geochemical studies on the Mahanadi River estuary, East Coast of India, Unpublished Ph.D. thesis. Utkal University, Bhubaneswar, India.
- Ray, S.B., Mohanti, M. 1989. Sedimentary processes in the Mahanadi River estuary, East Coast of India, Workshop on Coastal processes and coastal Quaternaries of Eastern India. Geological Survey of India, Eastern Region, Calcutta.
- Rehdanz, K. and Maddison, D. 2005. Climate and happiness. *Ecological Economics*, 52(1), pp. 111-125, ISSN 0921-8009.
- Sarkar, S. K. and A. K. Bhattacharya. 2003. Conservation of biodiversity of the coastal resources of Sundarbans, Northeast India: an integrated approach through environmental education. *Marine Pollution Bulletin* 47: 260-264.
- SDMBRI. 1996. *Impact of mass collection of prawn seeds in mangrove ecosystem of Sundarbans Biosphere Reserve*. S.D. Marine Biological Research Institute.
- Singh, O. P. 2007. "Long-term trends in the frequency of severe cyclones of Bay of Bengal: Observations and simulations". *Mausam* 58 (1): 59-66.

- Srikanta, S.V., Mahanadi delta – Geology, Resources and Biodiversity’ book review. Geological Society of India, P. B. No. 1922, Gavipuram P.O. Bangalore 560 019, India.
- TEEB. 2010. *The Economics of Ecosystems and Biodiversity: Mainstreaming the Economics of Nature: A synthesis of the approach, conclusions and recommendations of TEEB.* . The Economics of Ecosystems and Biodiversity (TEEB).
- Vale, P. M. 2016. The changing climate of climate change economics, In *Ecological Economics*, 121, pp. 12-19.
- Vinod, K., Bhattacharya, A. 2003. Geological evolution of Mahanadi delta, Orissa using high resolution satellite data. National Remote Sensing Agency, Balangar, Hyderabad, India.

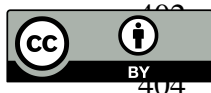

© 2018 by the authors. Submitted for possible open access publication under the terms and conditions of the Creative Commons Attribution (CC BY) license (<http://creativecommons.org/licenses/by/4.0/>).
